# Supplementary material
Source: publisher figshare collection journal article supplement (https://gsapubs.figshare.com/ndownloader/files/23317787)

**GSA Data Repository Item 2019405** accompanies Larsen, D., and Olson, K., 2019, Evolution of the Pleistocene Lake Tecopa beds, southeastern California: A stratigraphic and sedimentologic perspective, *in* Starratt, S.W., and Rosen, M.R., eds., *From Saline to Freshwater: The Diversity of Western Lakes in Space and Time*: Geological Society of America Special Paper 536, [https://doi.org/10.1130/2019.2536\(17\)](https://doi.org/10.1130/2019.2536(17)).

(on page 2) Figure 2. North-south measured and correlated sections<sup>1</sup> along A–A2 in Figure 1. Stratigraphic abbreviations: LCB—Lava Creek B ash bed; HMB—high marker bed; GM—Glass Mountain lake; BA—Bishop ash lake; LC—Lava Creek lake; Sh lake—relatively minor lake phase evident from exposures near Shoshone and sections LT-8B and LT-10. Grain-size abbreviations: Cl—clay; Si—silt; VF—very fine-grained sand; F—fine-grained sand; M—medium-grained sand; C—coarse-grained sand; VC—very coarse-grained sand; P—pebble; Cb—cobble.

(on page 3) Figure 3. West-east measured and correlated sections along B–B' (see footnote 1) in Figure 1. See Figure 2 for abbreviations.

(on page 4) Figure 4. West-east measured and correlated sections along C–C' and D–D' (see footnote 1) in Figure 1. Abbreviations: HR—Huckleberry Ridge ash bed; for all others, see Figure 2.



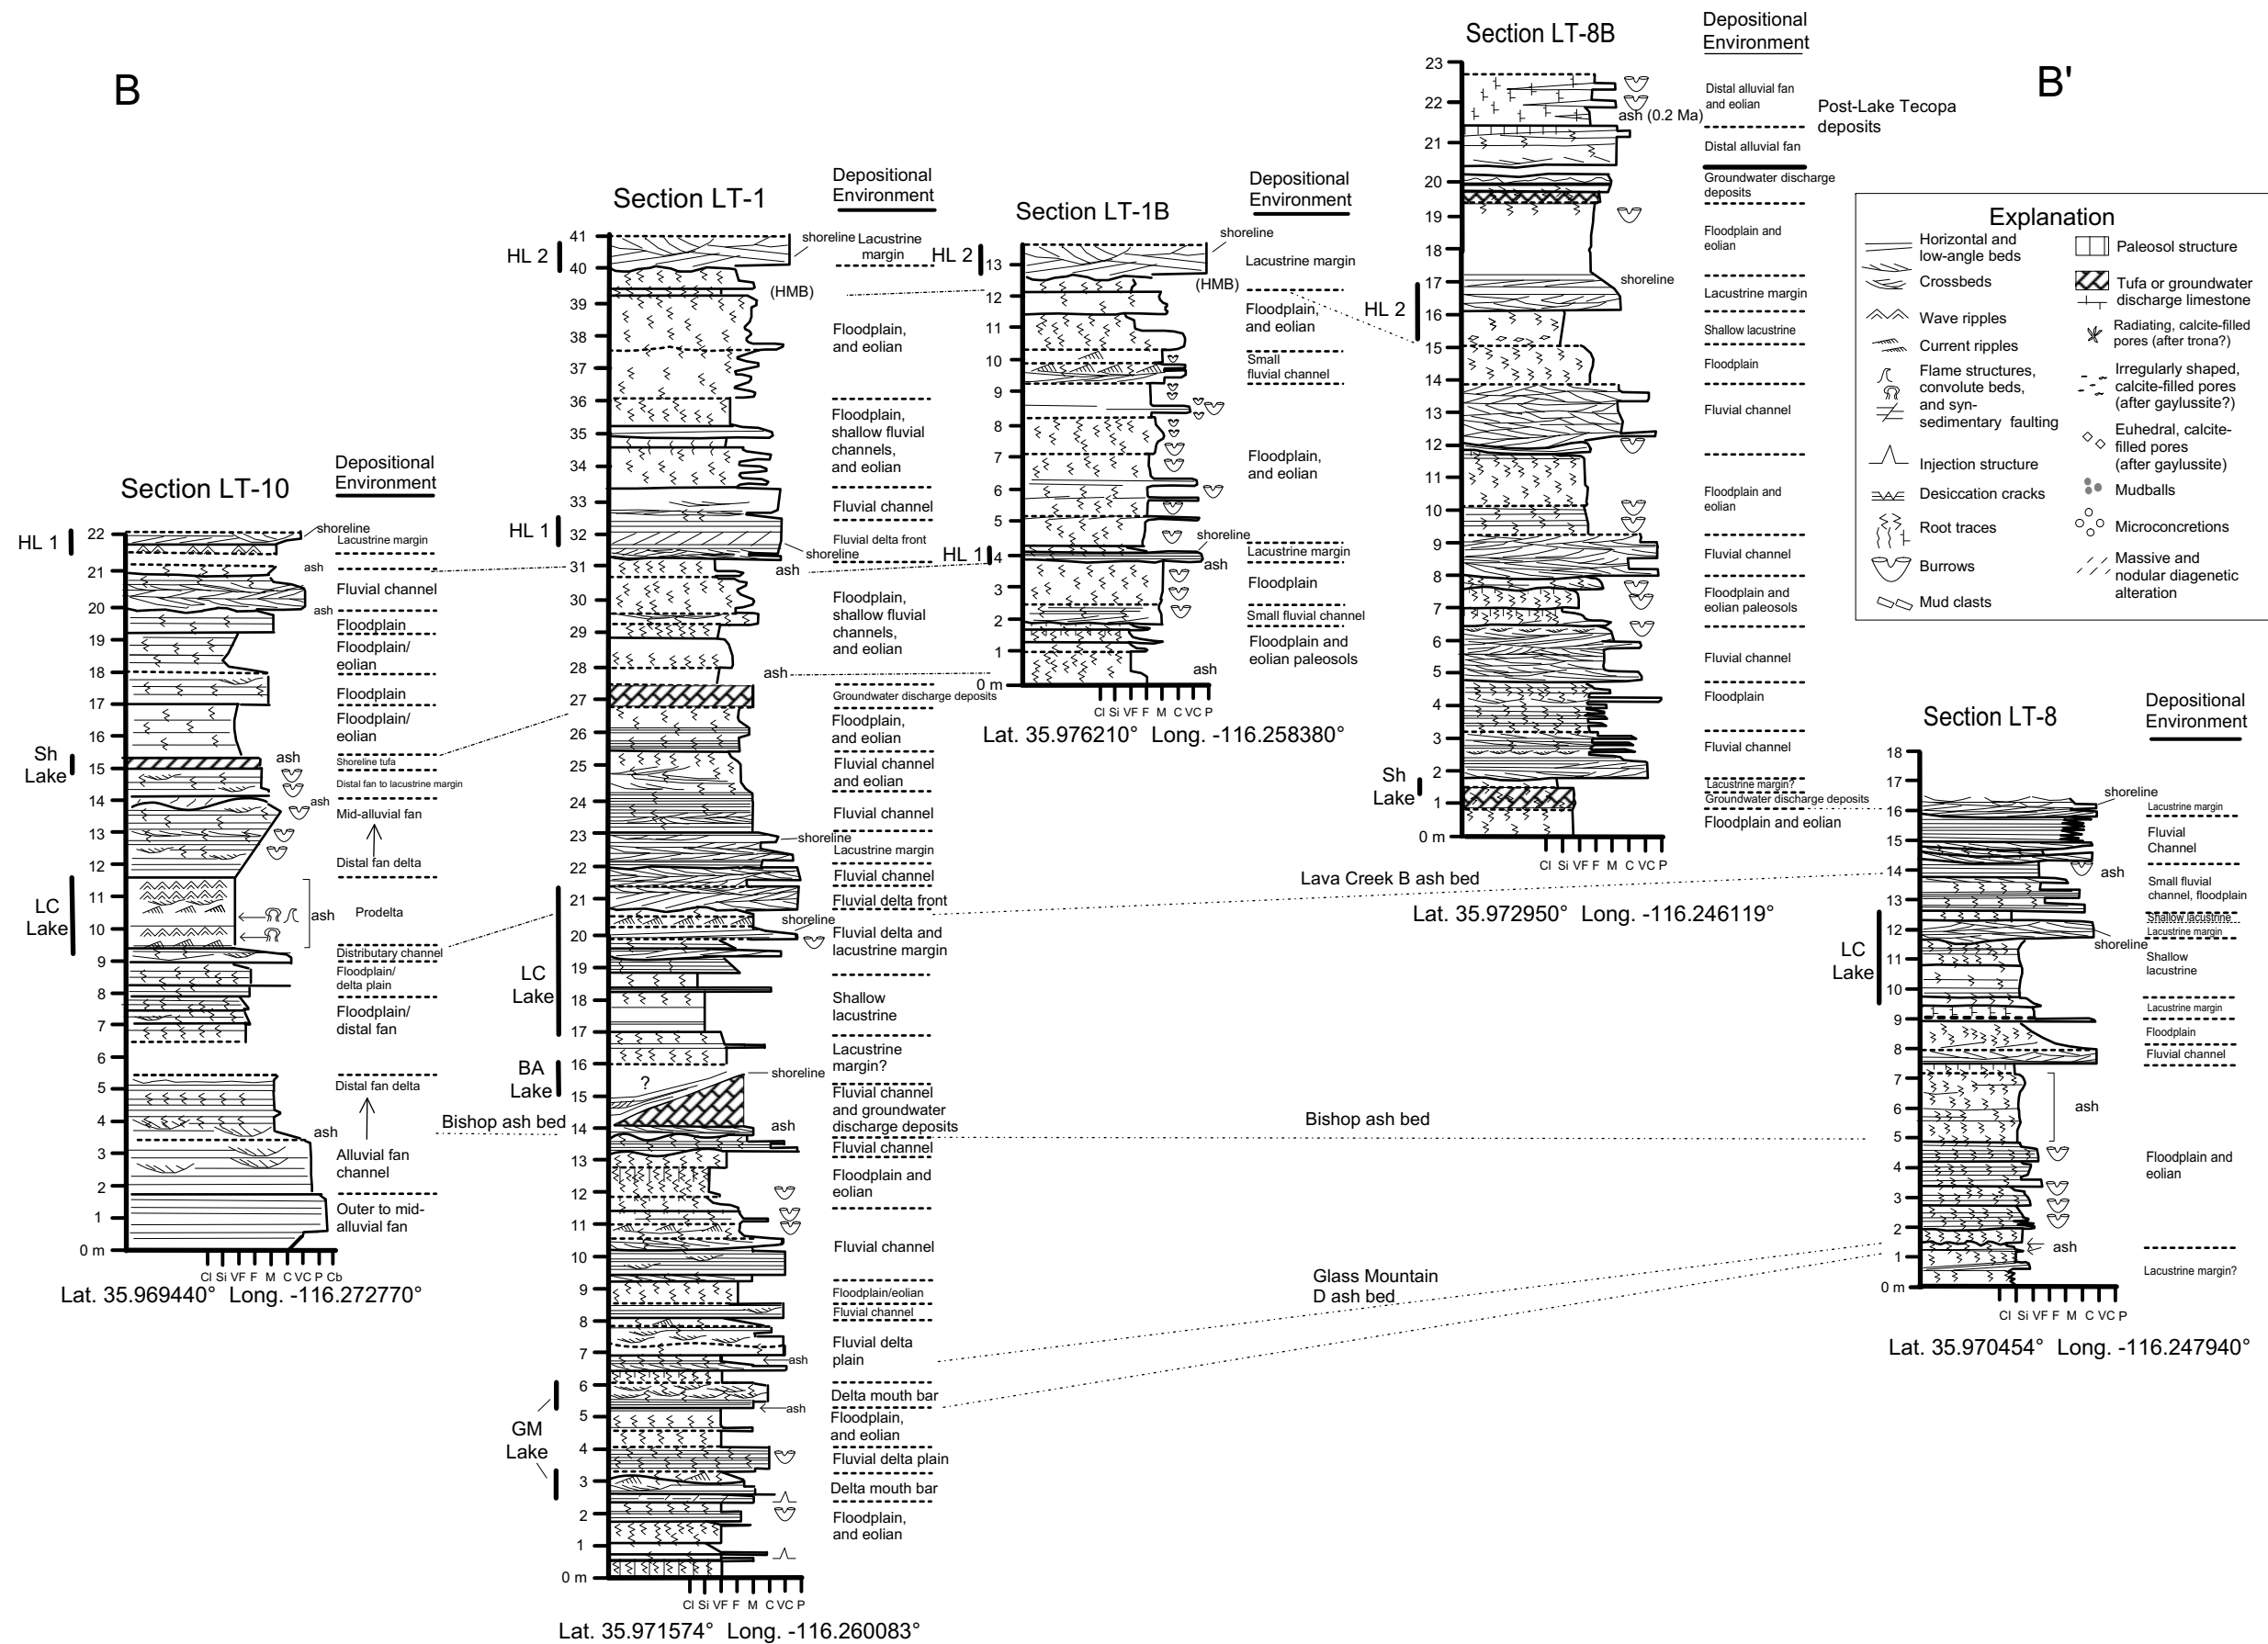

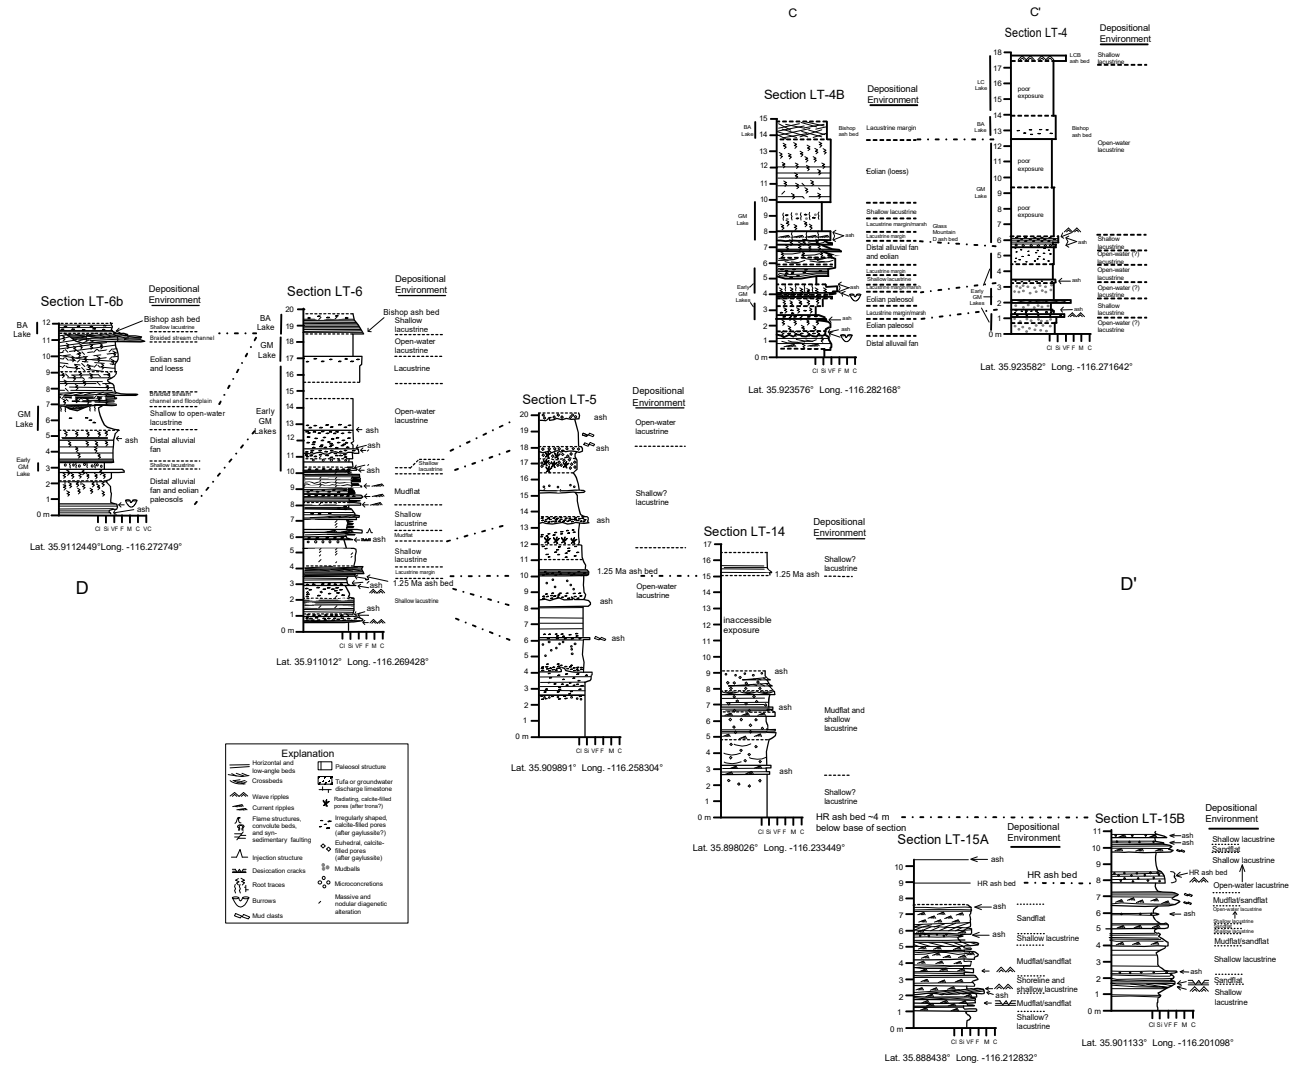

Supplement: Supplementary file 1 [file 23317787]
